# Supplementary material for: Genome-Wide Analysis of WRKY Gene Family and Negative Regulation of GhWRKY25 and GhWRKY33 Reveal Their Role in Whitefly and Drought Stress Tolerance in Cotton
Source: MDPI journal article supplement (doi:10.3390/genes14010171), 2023-01-07
Supplement: s1 [file s1]

# Genome-Wide Analysis of WRKY Gene Family and Negative Regulation of *GhWRKY25* and *GhWRKY33* Reveal Their Role in Whitefly and Drought Stress Tolerance in Cotton

Aiman Ehsan, Rubab Zahra Naqvi, Maryam Azhar, Muhammad Jawad Akbar Awan, Imran Amin, Shahid Mansoor and Muhammad Asif \*

Agricultural Biotechnology Division, National Institute for Biotechnology and Genetic Engineering (NIBGE), College of Pakistan Institute of Engineering and Applied Sciences (PIEAS), Jhang Road, Faisalabad 38000, Pakistan

\* Correspondence: asif.biosafety@gmail.com

Supplementary Table S1. Parameters of WRKY proteins in *G. hirsutum*.

| Name           | ID         | Group | PI   | M/W      | No. of amino acids | Instability index | Aliphatic index | Hydropathicity |
|----------------|------------|-------|------|----------|--------------------|-------------------|-----------------|----------------|
| <i>WRKY3</i>   | KF669771.1 | I     | 8.47 | 56340.82 | 516                | 57.26             | 61.30           | -0.766         |
| <i>WRKY8</i>   | KJ825858.1 | I     | 8.40 | 35901.47 | 325                | 44.19             | 49.48           | -0.970         |
| <i>WRKY9</i>   | KJ825859.1 | I     | 6.76 | 47780.95 | 437                | 55.42             | 48.65           | -0.931         |
| <i>WRKY10</i>  | KP202850.1 | I     | 7.70 | 42557.49 | 725                | 60.07             | 56.77           | -0.775         |
| <i>WRKY18</i>  | KF669858.1 | I     | 6.98 | 62666.43 | 573                | 55.46             | 48.18           | -0.914         |
| <i>WRKY22</i>  | KF669763.1 | I     | 6.21 | 44373.19 | 402                | 45.39             | 67.79           | -0.741         |
| <i>WRKY25</i>  | JF899343.1 | I     | 8.47 | 56349.83 | 516                | 56.89             | 61.30           | -0.765         |
| <i>WRKY36</i>  | KF031083.1 | I     | 9.16 | 51359.16 | 466                | 48.61             | 57.10           | -0.904         |
| <i>WRKY40</i>  | KC414679.1 | I     | 8.10 | 52920.32 | 314                | 47.49             | 61.46           | -0.752         |
| <i>WRKY44</i>  | KF031089.1 | I     | 8.80 | 51396.13 | 275                | 66.01             | 43.27           | -0.946         |
| <i>WRKY46</i>  | KF669766.1 | I     | 7.26 | 44236.18 | 404                | 45.91             | 64.58           | -0.836         |
| <i>WRKY62</i>  | KF031100.1 | I     | 5.71 | 78975.12 | 725                | 60.57             | 56.63           | -0.785         |
| <i>WRKY96</i>  | KF669769.1 | I     | 7.58 | 55287.66 | 503                | 43.95             | 47.48           | -0.850         |
| <i>WRKY97</i>  | KF669852.1 | I     | 9.10 | 51431.23 | 466                | 49.47             | 57.10           | -0.911         |
| <i>WRKY105</i> | KF669770.1 | I     | 7.65 | 43069.71 | 401                | 58.54             | 56.96           | -0.756         |
| <i>WRKY108</i> | KF669765.1 | I     | 7.60 | 49415.80 | 454                | 53.56             | 55.46           | -0.785         |
| <i>WRKY1</i>   | KF031069.1 | II-a  | 8.45 | 33937.91 | 524                | 41.00             | 66.15           | 0.772          |
| <i>WRKY24</i>  | KF669764.1 | II-a  | 8.68 | 28318.70 | 725                | 60.26             | 57.59           | -0.770         |
| <i>WRKY30</i>  | KF031079.1 | II-a  | 6.74 | 30502.04 | 277                | 54.48             | 51.84           | -0.722         |
| <i>WRKY71</i>  | KF669857.1 | II-a  | 8.41 | 34234.43 | 313                | 48.47             | 68.88           | -0.650         |
| <i>WRKY73</i>  | KF031104.1 | II-a  | 8.64 | 33737.86 | 301                | 63.20             | 49.50           | -0.987         |
| <i>WRKY83</i>  | KF669836.1 | II-a  | 6.46 | 34041.12 | 312                | 45.62             | 66.63           | -0.588         |
| <i>WRKY4</i>   | KF669822.1 | II-b  | 5.88 | 60612.12 | 561                | 41.31             | 64.76           | -0.655         |

|         |            |      |      |           |     |       |       |        |
|---------|------------|------|------|-----------|-----|-------|-------|--------|
| WRKY6   | KF669821.1 | II-b | 8.40 | 38334.02  | 362 | 52.44 | 59.14 | -0.533 |
| WRKY16  | KF669824.1 | II-b | 6.84 | 57800.24  | 525 | 40.89 | 65.83 | -0.791 |
| WRKY20  | KJ825865.1 | II-b | 6.22 | 59094.35  | 545 | 47.33 | 61.45 | -0.661 |
| WRKY51  | KF669825.1 | II-b | 8.57 | 54526.58  | 506 | 50.88 | 72.94 | -0.488 |
| WRKY76  | KF669827.1 | II-b | 7.28 | 61261.46  | 564 | 50.04 | 61.26 | -0.694 |
| WRKY79  | KF669828.1 | II-b | 7.03 | 55519.33  | 508 | 62.38 | 61.28 | -0.636 |
| WRKY81  | KF669830.1 | II-b | 5.85 | 48999.44  | 442 | 50.67 | 64.68 | -0.799 |
| WRKY87  | KF669829.1 | II-b | 7.24 | 60972.64  | 561 | 47.08 | 61.76 | -0.661 |
| WRKY90  | KF669851.1 | II-b | 6.77 | 54461.88  | 503 | 54.63 | 63.88 | -0.660 |
| WRKY2   | KF669759.1 | II-c | 9.64 | 18659.32  | 161 | 42.99 | 55.71 | -0.802 |
| WRKY14  | KF669762.1 | II-c | 9.22 | 18571.00  | 570 | 52.41 | 64.37 | -0.670 |
| WRKY15  | KF669833.1 | II-c | 9.64 | 17366.69  | 520 | 34.73 | 35.58 | 0.741  |
| WRKY23  | KX184202.1 | II-c | 5.94 | 35610.34  | 315 | 66.70 | 51.65 | -0.883 |
| WRKY37  | KF031084.1 | II-c | 7.77 | 34236.37  | 313 | 50.70 | 63.80 | -0.612 |
| WRKY38  | KF669838.1 | II-c | 8.82 | 105978.61 | 953 | 39.84 | 78.79 | -0.478 |
| WRKY49  | KF669813.1 | II-c | 8.99 | 21522.30  | 189 | 52.00 | 64.97 | -0.829 |
| WRKY52  | KF669850.1 | II-c | 9.81 | 26090.86  | 224 | 48.37 | 50.89 | -0.721 |
| WRKY67  | KF669844.1 | II-c | 6.07 | 33400.90  | 309 | 59.26 | 53.01 | -0.739 |
| WRKY68  | KJ551845.1 | II-c | 8.71 | 33186.32  | 295 | 65.23 | 59.83 | -0.804 |
| WRKY74  | KF031105.1 | II-c | 6.27 | 35524.15  | 507 | 54.64 | 59.84 | -0.784 |
| WRKY75  | MH138002.1 | II-c | 9.30 | 19510.07  | 170 | 32.05 | 60.12 | -0.831 |
| WRKY77  | KF669816.1 | II-c | 8.17 | 19833.50  | 171 | 40.91 | 60.47 | -0.912 |
| WRKY80  | KF031106.1 | II-c | 6.21 | 35684.65  | 466 | 48.75 | 63.88 | -0.615 |
| WRKY86  | KF669817.1 | II-c | 9.62 | 17564.10  | 150 | 70.27 | 48.73 | -0.895 |
| WRKY92  | KF669849.1 | II-c | 6.83 | 35621.36  | 314 | 59.37 | 40.41 | -0.961 |
| WRKY94  | KF669847.1 | II-c | 9.47 | 18536.90  | 160 | 29.25 | 57.19 | -0.955 |
| WRKY95  | KF669855.1 | II-c | 6.26 | 39610.00  | 360 | 65.03 | 58.33 | -0.771 |
| WRKY98  | KF669818.1 | II-c | 5.91 | 27273.48  | 238 | 53.73 | 67.18 | -0.936 |
| WRKY100 | KF031114.1 | II-c | 7.65 | 35926.41  | 320 | 52.49 | 66.38 | -0.666 |
| WRKY103 | KF031115.1 | II-c | 6.80 | 31552.14  | 467 | 58.77 | 64.58 | -0.531 |
| WRKY104 | KF031116.1 | II-c | 6.26 | 36085.12  | 321 | 63.73 | 54.61 | -0.778 |
| WRKY112 | KF669803.1 | II-c | 5.06 | 18401.12  | 157 | 54.39 | 49.62 | -1.186 |
| WRKY113 | KF669804.1 | II-c | 7.69 | 23538.15  | 207 | 39.87 | 54.15 | -0.875 |
| WRKY114 | KF669805.1 | II-c | 4.98 | 18723.77  | 162 | 55.46 | 54.75 | -0.906 |
| WRKY115 | KF669839.1 | II-c | 6.43 | 19887.05  | 174 | 58.48 | 52.07 | -0.973 |
| WRKY116 | KF031118.1 | II-c | 8.88 | 25436.78  | 489 | 60.28 | 56.48 | -0.693 |
| WRKY11  | KJ825861.1 | II-d | 9.48 | 36298.14  | 335 | 45.24 | 64.96 | -0.459 |
| WRKY12  | KF669853.1 | II-d | 9.51 | 36134.00  | 335 | 47.12 | 64.09 | -0.447 |
| WRKY21  | KT983420.1 | II-d | 9.51 | 36874.78  | 331 | 55.98 | 62.78 | -0.768 |
| WRKY32  | KF031081.1 | II-d | 9.73 | 38735.93  | 358 | 57.80 | 62.40 | -0.698 |
| WRKY39  | KF220643.1 | II-d | 4.88 | 293756.35 | 323 | 56.47 | 58.85 | -0.876 |

|         |            |      |      |          |     |       |        |        |
|---------|------------|------|------|----------|-----|-------|--------|--------|
| WRKY42  | KF669797.1 | II-d | 9.40 | 37841.67 | 345 | 49.52 | 62.20  | -0.653 |
| WRKY47  | KF669798.1 | II-d | 9.66 | 37240.19 | 336 | 58.05 | 61.55  | -0.734 |
| WRKY54  | KF031095.1 | II-d | 9.92 | 36662.26 | 504 | 48.24 | 66.45  | -0.529 |
| WRKY69  | KF669845.1 | II-d | 9.36 | 36599.47 | 330 | 47.01 | 63.24  | -0.614 |
| WRKY78  | KF669801.1 | II-d | 9.66 | 38721.90 | 354 | 46.65 | 66.69  | -0.588 |
| WRKY84  | KF669802.1 | II-d | 9.59 | 36688.47 | 341 | 45.61 | 66.63  | -0.447 |
| WRKY93  | KF669854.1 | II-d | 9.58 | 39324.46 | 358 | 58.34 | 61.31  | -0.711 |
| WRKY111 | KF031117.1 | II-d | 9.51 | 36874.78 | 355 | 50.20 | 64.28  | -0.738 |
| WRKY118 | KF031119.1 | II-d | 9.51 | 36846.73 | 331 | 56.50 | 62.21  | -0.775 |
| WRKY19  | KF669784.1 | II-e | 9.25 | 30225.60 | 264 | 53.69 | 74.92  | -0.597 |
| WRKY26  | KJ825868.1 | II-e | 6.51 | 35568.21 | 325 | 49.29 | 48.00  | -0.715 |
| WRKY28  | KF669796.1 | II-e | 5.63 | 38863.39 | 292 | 65.23 | 71.06  | -0.524 |
| WRKY29  | KF669795.1 | II-e | 6.71 | 35537.24 | 117 | 34.32 | 120.60 | 0.150  |
| WRKY31  | KF031080.1 | II-e | 5.06 | 30088.36 | 561 | 50.29 | 61.09  | -0.690 |
| WRKY43  | KF031088.1 | II-e | 5.15 | 30485.88 | 276 | 46.69 | 52.64  | -0.806 |
| WRKY48  | JN609590.1 | II-e | 5.74 | 35950.67 | 360 | 65.03 | 58.33  | -0.771 |
| WRKY53  | KF669786.1 | II-e | 5.12 | 29943.25 | 267 | 56.52 | 59.85  | -0.928 |
| WRKY57  | KF669787.1 | II-e | 5.30 | 37321.46 | 349 | 42.63 | 55.13  | -0.768 |
| WRKY58  | KF031097.1 | II-e | 5.45 | 42389.22 | 560 | 45.05 | 62.79  | -0.682 |
| WRKY61  | KF669790.1 | II-e | 5.60 | 34014.05 | 300 | 47.60 | 62.37  | -0.733 |
| WRKY65  | KF031102.1 | II-e | 5.06 | 25801.60 | 251 | 54.22 | 52.83  | -0.925 |
| WRKY72  | KF669791.1 | II-e | 4.95 | 49320.61 | 459 | 55.61 | 58.95  | -0.581 |
| WRKY82  | KF669768.1 | II-e | 5.14 | 40557.28 | 371 | 58.41 | 53.58  | -1.040 |
| WRKY85  | KF669792.1 | II-e | 5.15 | 30485.88 | 276 | 46.69 | 52.64  | -0.806 |
| WRKY91  | KF669793.1 | II-e | 5.13 | 29816.79 | 273 | 60.12 | 47.18  | -0.792 |
| WRKY5   | KF669781.1 | III  | 5.63 | 38298.01 | 335 | 50.80 | 65.46  | -0.693 |
| WRKY7   | KF669776.1 | III  | 5.97 | 34664.65 | 305 | 51.44 | 61.97  | -0.847 |
| WRKY13  | KJ825862.1 | III  | 7.09 | 23054.84 | 203 | 46.51 | 66.26  | -0.865 |
| WRKY17  | KJ825864.1 | III  | 9.11 | 24545.83 | 212 | 44.65 | 58.40  | -0.951 |
| WRKY27  | KJ825869.1 | III  | 5.41 | 34657.48 | 305 | 52.68 | 60.10  | -0.830 |
| WRKY33  | KC414677.1 | III  | 5.10 | 40785.09 | 510 | 45.80 | 45.31  | -0.843 |
| WRKY34  | KF031082.1 | III  | 5.61 | 35311.46 | 354 | 47.53 | 65.85  | -0.591 |
| WRKY41  | KF031087.1 | III  | 5.46 | 40062.62 | 350 | 47.15 | 68.26  | -0.463 |
| WRKY50  | KF669783.1 | III  | 5.58 | 37405.83 | 334 | 49.20 | 68.56  | -0.562 |
| WRKY56  | KF031096.1 | III  | 6.18 | 36738.61 | 335 | 50.80 | 65.46  | -0.693 |
| WRKY59  | KF031098.1 | III  | 5.33 | 32150.71 | 349 | 55.24 | 67.42  | -0.515 |
| WRKY60  | KF669778.1 | III  | 5.42 | 39792.12 | 355 | 49.12 | 65.38  | -0.724 |
| WRKY64  | KF031101.1 | III  | 6.21 | 22645.47 | 355 | 52.75 | 63.69  | -0.730 |
| WRKY70  | MF278614.1 | III  | 5.97 | 34648.65 | 305 | 50.81 | 62.30  | -0.838 |
| WRKY88  | KF031110.1 | III  | 5.21 | 31214.79 | 335 | 45.55 | 56.54  | -0.584 |
| WRKY101 | KF669777.1 | III  | 6.04 | 39334.71 | 360 | 56.15 | 55.86  | -0.682 |

|                |            |     |      |          |     |       |       |        |
|----------------|------------|-----|------|----------|-----|-------|-------|--------|
| <i>WRKY102</i> | KF669772.1 | III | 5.57 | 34311.27 | 302 | 62.74 | 56.56 | -0.751 |
| <i>WRKY106</i> | KF669780.1 | III | 6.79 | 35027.96 | 305 | 51.67 | 53.34 | -0.963 |

PI=Isoelectric point, M/W=Molecular weight
